# Supplementary material
Source: PubMed Central journal article supplement (PMC3743225)
Supplement: NIHMS501186-supplement-01.pdf [file NIHMS501186-supplement-01.pdf]

Supplementary Information

Table A. Partial<sup>a</sup> spearman correlation coefficients between each air pollutant metric (today) and the previous day's metrics (yesterday)

| Today             | Metric* | CO Yesterday |       |       |       |       | NO <sub>2</sub> Yesterday |       |       |       |       | O <sub>3</sub> Yesterday |      |       |      |      | PM <sub>2.5</sub> Yesterday |       |       |      |       |       |
|-------------------|---------|--------------|-------|-------|-------|-------|---------------------------|-------|-------|-------|-------|--------------------------|------|-------|------|------|-----------------------------|-------|-------|------|-------|-------|
|                   |         | 1-hr         | 24-hr | com   | day   | night | 1-hr                      | 24-hr | com   | day   | night | 8-hr                     | 1-hr | 24-hr | com  | day  | night                       | 1-hr  | 24-hr | com  | day   | night |
| CO                | 1-hr    | 0.18         | 0.15  | 0.07  | 0.07  | -0.04 | 0.15                      | 0.08  | 0.01  | -0.01 | -0.02 | 0.04                     | 0.06 | -0.05 | 0.04 | 0.04 | -0.04                       | 0.12  | 0.04  | 0.01 | -0.03 | -0.02 |
|                   | 24-hr   | 0.29         | 0.29  | 0.19  | 0.20  | 0.05  | 0.22                      | 0.17  | 0.09  | 0.07  | 0.05  | 0.08                     | 0.11 | -0.05 | 0.05 | 0.07 | -0.08                       | 0.19  | 0.11  | 0.09 | 0.04  | 0.03  |
|                   | com     | 0.25         | 0.28  | 0.21  | 0.23  | 0.08  | 0.20                      | 0.17  | 0.11  | 0.09  | 0.07  | 0.09                     | 0.11 | -0.02 | 0.04 | 0.08 | -0.08                       | 0.16  | 0.10  | 0.08 | 0.04  | 0.03  |
|                   | day     | 0.23         | 0.29  | 0.24  | 0.28  | 0.13  | 0.17                      | 0.18  | 0.14  | 0.12  | 0.10  | 0.11                     | 0.12 | 0.01  | 0.05 | 0.09 | -0.07                       | 0.16  | 0.12  | 0.12 | 0.08  | 0.06  |
|                   | night   | 0.51         | 0.50  | 0.34  | 0.33  | 0.13  | 0.38                      | 0.34  | 0.21  | 0.19  | 0.15  | 0.13                     | 0.16 | -0.08 | 0.06 | 0.11 | -0.14                       | 0.34  | 0.24  | 0.20 | 0.13  | 0.11  |
| NO <sub>2</sub>   | 1-hr    | 0.14         | 0.11  | 0.05  | 0.04  | -0.01 | 0.21                      | 0.13  | 0.03  | 0.02  | 0.03  | 0.14                     | 0.15 | 0.04  | 0.12 | 0.13 | -0.09                       | 0.09  | 0.06  | 0.03 | -0.00 | -0.00 |
|                   | 24-hr   | 0.22         | 0.18  | 0.10  | 0.07  | 0.03  | 0.32                      | 0.26  | 0.14  | 0.12  | 0.10  | 0.19                     | 0.21 | 0.03  | 0.13 | 0.17 | -0.13                       | 0.15  | 0.11  | 0.08 | 0.04  | 0.03  |
|                   | com     | 0.22         | 0.18  | 0.11  | 0.07  | 0.07  | 0.29                      | 0.26  | 0.17  | 0.14  | 0.14  | 0.21                     | 0.23 | 0.05  | 0.14 | 0.19 | -0.15                       | 0.15  | 0.14  | 0.11 | 0.07  | 0.08  |
|                   | day     | 0.19         | 0.16  | 0.10  | 0.05  | 0.08  | 0.27                      | 0.27  | 0.21  | 0.17  | 0.16  | 0.18                     | 0.20 | 0.03  | 0.10 | 0.16 | -0.13                       | 0.15  | 0.15  | 0.12 | 0.08  | 0.08  |
|                   | night   | 0.32         | 0.28  | 0.18  | 0.14  | 0.06  | 0.43                      | 0.36  | 0.21  | 0.18  | 0.14  | 0.21                     | 0.24 | 0.00  | 0.13 | 0.19 | -0.13                       | 0.24  | 0.18  | 0.14 | 0.10  | 0.09  |
| O <sub>3</sub>    | 8-hr    | 0.05         | 0.04  | 0.02  | 0.02  | 0.00  | 0.08                      | 0.02  | -0.04 | -0.02 | 0.00  | 0.23                     | 0.24 | 0.24  | 0.27 | 0.24 | 0.21                        | 0.13  | 0.12  | 0.10 | 0.10  | 0.03  |
|                   | 1-hr    | 0.06         | 0.06  | 0.03  | 0.04  | 0.01  | 0.11                      | 0.06  | -0.01 | 0.00  | 0.01  | 0.20                     | 0.21 | 0.18  | 0.22 | 0.20 | 0.00                        | 0.13  | 0.12  | 0.10 | 0.10  | 0.02  |
|                   | 24-hr   | -0.03        | -0.01 | 0.00  | 0.00  | 0.03  | -0.04                     | -0.07 | -0.07 | -0.06 | -0.02 | 0.23                     | 0.22 | 0.32  | 0.28 | 0.25 | 0.05                        | 0.09  | 0.10  | 0.08 | 0.10  | 0.04  |
|                   | com     | -0.04        | -0.04 | -0.04 | -0.03 | -0.03 | -0.04                     | -0.08 | -0.10 | -0.09 | -0.06 | 0.16                     | 0.15 | 0.22  | 0.22 | 0.17 | 0.06                        | 0.05  | 0.05  | 0.03 | 0.05  | -0.01 |
|                   | day     | 0.02         | 0.02  | -0.00 | 0.01  | -0.01 | 0.04                      | -0.01 | -0.06 | -0.05 | -0.03 | 0.20                     | 0.20 | 0.21  | 0.24 | 0.21 | 0.03                        | 0.09  | 0.08  | 0.06 | 0.07  | 0.00  |
|                   | night   | -0.24        | -0.17 | -0.08 | -0.08 | 0.02  | -0.25                     | -0.21 | -0.10 | -0.11 | -0.04 | 0.12                     | 0.08 | 0.33  | 0.19 | 0.14 | 0.11                        | -0.03 | 0.04  | 0.04 | 0.08  | 0.05  |
| PM <sub>2.5</sub> | 1-hr    | 0.21         | 0.18  | 0.11  | 0.10  | 0.09  | 0.28                      | 0.24  | 0.17  | 0.15  | 0.13  | 0.27                     | 0.29 | 0.14  | 0.22 | 0.26 | -0.10                       | 0.32  | 0.31  | 0.26 | 0.23  | 0.17  |
|                   | 24-hr   | 0.29         | 0.27  | 0.17  | 0.14  | 0.15  | 0.35                      | 0.33  | 0.25  | 0.22  | 0.22  | 0.34                     | 0.36 | 0.19  | 0.29 | 0.33 | -0.12                       | 0.42  | 0.43  | 0.37 | 0.34  | 0.24  |
|                   | com     | 0.25         | 0.23  | 0.14  | 0.13  | 0.16  | 0.33                      | 0.31  | 0.23  | 0.21  | 0.21  | 0.30                     | 0.33 | 0.15  | 0.25 | 0.29 | -0.10                       | 0.38  | 0.38  | 0.32 | 0.30  | 0.22  |
|                   | day     | 0.23         | 0.23  | 0.14  | 0.12  | 0.14  | 0.28                      | 0.29  | 0.23  | 0.22  | 0.22  | 0.30                     | 0.33 | 0.17  | 0.25 | 0.29 | -0.09                       | 0.36  | 0.39  | 0.34 | 0.32  | 0.24  |
|                   | night   | 0.42         | 0.37  | 0.24  | 0.18  | 0.20  | 0.44                      | 0.41  | 0.31  | 0.27  | 0.26  | 0.40                     | 0.42 | 0.23  | 0.35 | 0.40 | -0.15                       | 0.53  | 0.57  | 0.50 | 0.46  | 0.31  |

\* 1-hr=1hour maximum      24-hr=24 hour average      com=commute hours:7-10 am and 4-7pm      day= 8am-7pm      night= hours 12 am -6 am

<sup>a</sup> controlling for covariates included in the Poisson regression model (month-year-maximum temperature strata, lag 1-2 moving average minimum temperature, lag 0-1-2 moving average of dew point temperature, day of week, holidays)
